# Supplementary material for: Effects of MYBPC3 loss-of-function mutations preceding hypertrophic cardiomyopathy
Source: JCI journal article supplement (doi:10.1172/jci.insight.133782), 2019-12-26
Supplement: sd1 [file 1]

You are being redirected.
